# Supplementary material
Source: PubMed Central journal article supplement (PMC3748981)
Supplement: jbjs_95_10_865_ds01.pdf [file jbjs_95_10_865_ds01.pdf]

**TABLE E-1 Demographic, Clinical, and Laboratory Data for the Patients Who Underwent Revision Surgery as a Result of Corrosion at the Modular Neck-Body Taper Junction\***

| Case | Age  | Sex | BMI (kg/m <sup>2</sup> ) | Months to Initial Symptoms | Location of Pain          | Other Symptoms           | Harris Hip Score | Months to Revision | ESR (mm/hr) | CRP (mg/L) | Serum Cobalt (ng/mL) | Serum Chromium (ng/mL) | Serum Titanium (ng/mL) |
|------|------|-----|--------------------------|----------------------------|---------------------------|--------------------------|------------------|--------------------|-------------|------------|----------------------|------------------------|------------------------|
| 1    | 66.2 | F   | 28.3                     | —                          | Groin                     | —                        | 37               | 19.5               | 31          | <5         | 5.6                  | 0.8                    | 4.9                    |
| 2    | 64.0 | M   | 23.3                     | 13.3                       | Groin                     | —                        | —                | 15.6               | 20          | 23         | —                    | —                      | —                      |
| 3    | 61.2 | F   | 38.0                     | 6.0                        | Groin                     | Limp, weakness, swelling | 22               | 20.7               | 30          | 36         | 9.5                  | 0.6                    | 3.4                    |
| 4    | 63.4 | M   | 27.9                     | 5.1                        | Groin and trochanteric    | —                        | 43               | 12.6               | 3           | 5          | —                    | —                      | —                      |
| 5    | 74.2 | F   | 26.3                     | 5.8                        | Groin and buttock         | —                        | —                | 12.5               | 30          | 27         | 5.4†                 | 0.4†                   | —                      |
| 6†   | 43.0 | F   | 19.6                     | 7.4                        | Groin, thigh, and buttock | Limp                     | —                | 16.0               | 45          | 11         | 4.2                  | 0.3                    | 3.1                    |
| 7†   | 43.0 | F   | 19.6                     | 7.4                        | Groin, thigh, and buttock | Limp                     | —                | 11.8               | 45          | 11         | 4.2                  | 0.3                    | 3.1                    |
| 8    | 65.4 | M   | 30.2                     | 8.1                        | Groin                     | —                        | —                | 14.6               | 26          | 6          | 8.9                  | 1.0                    | 5.8                    |
| 9    | 46.9 | F   | 43.6                     | 6.8                        | Groin                     | Limp                     | —                | 14.4               | 59          | 7          | 5.1                  | 0.5                    | 1.6                    |
| 10   | 54.6 | F   | 19.5                     | 9.3                        | Groin and buttock         | —                        | 71               | 12.4               | 30          | <5         | 4.4                  | 0.8                    | 2.8                    |
| 11   | 77.1 | F   | 23.1                     | 11.0                       | Groin, buttock, and thigh | —                        | —                | 23.1               | 62          | 24         | 8.8†                 | 1.2†                   | —                      |
| 12   | 61.8 | F   | 20.8                     | 6.8                        | Groin                     | —                        | 43               | 9.7                | 7           | <5         | 3.9                  | 0.2                    | 2.8                    |

\*BMI = body-mass index, ESR = erythrocyte sedimentation rate, and CRP = C-reactive protein level. Dashes indicate that the data were not available. †Cases 6 and 7 represent the two hips of one patient in whom the problem was bilateral. ‡Indicates values obtained at an outside commercial laboratory.

**TABLE E-2 Surgical and Implant Data of Patients Who Underwent Revision Surgery as a Result of Corrosion at the Modular Neck-Body Taper Junction\***

| Case | Preoperative Diagnosis | Surgical Approach | Femoral Component   | Modular Neck | Neck Version   | Head Size, Length                           | Bearing Surface  | Acetabular Component   |
|------|------------------------|-------------------|---------------------|--------------|----------------|---------------------------------------------|------------------|------------------------|
| 1    | DJD                    | Posterior         | Rejuvenate (size 7) | 132° × 30 mm | Neutral        | 36 mm, +0 mm                                | Metal-Poly       | Trident PSL            |
| 2    | DJD                    | Anterolateral     | Rejuvenate (size 8) | 132° × 30 mm | Neutral        | 40 mm, universal (+4-mm adapter sleeve)     | Ceramic-Poly     | Trident PSL            |
| 3    | DJD                    | Posterior         | Rejuvenate (size 7) | 127° × 34 mm | Neutral        | 36 mm, -5 mm                                | Ceramic-Poly     | Trident PSL            |
| 4    | DJD                    | Posterior         | Rejuvenate (size 9) | 127° × 42 mm | 8° Anteverted  | 44 mm, universal (+4-mm adapter sleeve)     | Ceramic-Poly     | Trident PSL            |
| 5    | DJD                    | Posterior         | Rejuvenate (size 9) | 132° × 34 mm | Neutral        | 36 mm, -5 mm                                | Metal-Poly       | Trident PSL            |
| 6†   | DJD                    | Posterior         | Rejuvenate (size 8) | 132° × 34 mm | Neutral        | 36 mm, -2.5 mm                              | Ceramic-Poly     | Trident PSL            |
| 7†   | DJD                    | Posterior         | Rejuvenate (size 8) | 132° × 34 mm | Neutral        | 36 mm, -2.5 mm                              | Ceramic-Poly     | Trident PSL            |
| 8    | DJD                    | Posterior         | Rejuvenate (size 9) | 132° × 34 mm | 8° Retroverted | 36 mm, -5 mm                                | Ceramic-Poly     | Trident PSL            |
| 9    | DJD                    | Posterior         | Rejuvenate (size 7) | 127° × 34 mm | 8° Anteverted  | 36 mm, +0 mm                                | Ceramic-Poly     | Trident PSL            |
| 10   | DJD                    | Posterior         | Rejuvenate (size 7) | 132° × 34 mm | Neutral        | 36 mm, +0 mm                                | Ceramic-Poly     | Trident PSL            |
| 11   | DJD                    | Posterior         | Rejuvenate (size 8) | 127° × 38 mm | 8° Anteverted  | 32 mm, +0 mm                                | Metal-Poly       | Tritanium              |
| 12   | DJD                    | Posterior         | Rejuvenate (size 7) | 132° × 34 mm | 8° Anteverted  | 28 mm, +0 mm (40-mm Anatomic Dual Mobility) | Metal-Poly-Metal | Anatomic Dual Mobility |

\*DJD = degenerative joint disease, Poly = polyethylene, and PSL = peripheral self locking. †Indicates bilateral case.

**TABLE E-3 Results of Microscopic and Histologic Examinations of Implants and Tissue Removed at the Time of Revision Surgery\***

| Case | Corrosion at Neck-Body Junction | Corrosion at Head-Neck Junction? | Necrosis | Surface Fibrin | Diffuse Lymphocytes | Perivascular Lymphocytes | Plasma Cells | Eosinophils | Polymorphonuclear Leukocytes | Particles         |
|------|---------------------------------|----------------------------------|----------|----------------|---------------------|--------------------------|--------------|-------------|------------------------------|-------------------|
| 1    | Yes                             | No                               | 4        | 3              | 3                   | 0                        | 0            | 2           | 0                            | CrPO <sub>4</sub> |
| 2    | Yes                             | Yes                              | 4        | 1              | 4                   | 4                        | 0            | 1           | 0                            | none              |
| 3    | Yes                             | Yes                              | 4        | 4              | 4                   | 3                        | 3            | 2           | 0                            | CrPO <sub>4</sub> |
| 4    | —                               | —                                | 0        | 2              | 4                   | 4                        | 0            | 0           | 0                            | none              |
| 5    | Yes                             | Yes                              | 4        | 3              | 4                   | 2                        | 2            | 2           | 1                            | CrPO <sub>4</sub> |
| 6†   | Yes                             | Yes                              | 4        | 2              | 4                   | 1                        | 0            | 2           | 0                            | CrPO <sub>4</sub> |
| 7†   | Yes                             | No                               | —        | —              | —                   | —                        | —            | —           | —                            | —                 |
| 8    | Yes                             | Yes                              | 4        | 3              | 4                   | 2                        | 2            | 1           | 1                            | CrPO <sub>4</sub> |
| 9    | Yes                             | Yes                              | 4        | 2              | 4                   | 1                        | 0            | 2           | 0                            | none              |
| 10   | Yes                             | No                               | 0        | 2              | 4                   | 2                        | 3            | 0           | 1                            | none              |
| 11   | —                               | —                                | —        | —              | —                   | —                        | —            | —           | —                            | —                 |
| 12   | Yes                             | No                               | 0        | 0              | 0                   | 0                        | 0            | 0           | 0                            | CrPO <sub>4</sub> |

\*Histopathology scores are graded as follows: 0 = none, 1 = rare, 2 = mild, 3 = moderate, and 4 = marked. Dashes indicate that samples were not available.  
†Indicates bilateral case.

**TABLE E-4 Preoperative Metal Levels in Serum of Patients Who Underwent Revision Surgery as a Result of Corrosion at the Modular Neck-Body Junction**

|          | Mean ± Standard Deviation | Range      | Reference Value*  | Elevation Above Reference |
|----------|---------------------------|------------|-------------------|---------------------------|
| Titanium | 3.4 ± 1.3                 | 1.6 to 5.8 | 4.1 (1.1 to 11.2) | 0.8 ×                     |
| Cobalt   | 6.0 ± 2.2                 | 3.9 to 9.5 | 0.3 (0.2 to 1.6)  | 18.7 ×                    |
| Chromium | 0.6 ± 0.3                 | 0.2 to 1.2 | 0.3 (0.02 to 1.5) | 2.3 ×                     |

\*Reference data are from data at our institution of patients with a well-functioning metal-on-polyethylene total hip prosthesis at thirty-six months postoperatively (a proximally porous-coated modular titanium-alloy stem with a cobalt-alloy head and a titanium socket)<sup>25</sup>. All values given in ng/mL or parts per billion (ppb).
